# Supplementary material for: Single-cell transcriptomics of peripheral blood in the aging mouse
Source: publisher site journal article supplement (doi:10.18632/aging.204471), 2023-01-06
Supplement: Supplementary file [file aging-v15i1-204471-supplementary-material-SD2.pdf]

**SUPPLEMENTARY TABLE**

**Supplementary Table 1. Seurat cell-cycle scoring of each cluster.**

| <b>Cluster name</b> | <b>Phase</b> | <b>Count</b> |
|---------------------|--------------|--------------|
| <b>NK</b>           | <b>G1</b>    | 135          |
|                     | <b>G2M</b>   | 83           |
|                     | <b>S</b>     | 194          |
| <b>Naive Cd8 T</b>  | <b>G1</b>    | 338          |
|                     | <b>G2M</b>   | 222          |
|                     | <b>S</b>     | 374          |
| <b>Fcer2a B</b>     | <b>G1</b>    | 2154         |
|                     | <b>G2M</b>   | 1029         |
|                     | <b>S</b>     | 2378         |
| <b>Naive Cd4 T</b>  | <b>G1</b>    | 537          |
|                     | <b>G2M</b>   | 416          |
|                     | <b>S</b>     | 501          |
| <b>DC</b>           | <b>G1</b>    | 79           |
|                     | <b>G2M</b>   | 14           |
|                     | <b>S</b>     | 27           |
| <b>Basophil</b>     | <b>G1</b>    | 17           |
|                     | <b>G2M</b>   | 12           |
|                     | <b>S</b>     | 19           |
| <b>Old T</b>        | <b>G1</b>    | 27           |
|                     | <b>G2M</b>   | 16           |
|                     | <b>S</b>     | 23           |
| <b>Macrophage</b>   | <b>G1</b>    | 50           |
|                     | <b>S</b>     | 1            |
|                     | <b>G1</b>    | 59           |
| <b>Cytotoxic T</b>  | <b>G2M</b>   | 52           |
|                     | <b>S</b>     | 89           |
|                     | <b>G1</b>    | 132          |
| <b>Mk</b>           | <b>G2M</b>   | 37           |
|                     | <b>S</b>     | 106          |
|                     | <b>G1</b>    | 699          |
| <b>Mono</b>         | <b>G2M</b>   | 184          |
|                     | <b>S</b>     | 214          |
|                     | <b>G1</b>    | 112          |
| <b>Memory T</b>     | <b>G2M</b>   | 50           |
|                     | <b>S</b>     | 101          |
|                     | <b>G2M</b>   | 48           |
| <b>T and B</b>      | <b>S</b>     | 22           |
|                     | <b>G1</b>    | 1298         |
|                     | <b>G2M</b>   | 351          |
| <b>Crip1 B</b>      | <b>S</b>     | 1085         |
|                     | <b>G1</b>    | 139          |
|                     | <b>G2M</b>   | 73           |
| <b>RBC</b>          | <b>S</b>     | 129          |

|                 |            |     |
|-----------------|------------|-----|
|                 | <b>G1</b>  | 231 |
| <b>Vpreb3 B</b> | <b>G2M</b> | 93  |
|                 | <b>S</b>   | 260 |
|                 | <b>G1</b>  | 242 |
| <b>Zcwpw1 B</b> | <b>G2M</b> | 17  |
|                 | <b>S</b>   | 119 |

---
